# Supplementary material for: Identification of Drug Interaction Adverse Events in Patients With COVID-19: A Systematic Review
Source: PubMed Central journal article supplement (PMC9020212; doi:10.1001/jamanetworkopen.2022.7970), 2022-04-19
Supplement: jamanetwopen-e227970-s001.pdf [file jamanetwopen-e227970-s001.pdf]

## Supplementary Online Content

Conti V, Sellitto C, Torsiello M, et al. Identification of drug interaction adverse events in patients with COVID-19: a systematic review. *JAMA Netw Open*. 2022;5(4):e227970.  
doi:10.1001/jamanetworkopen.2022.7970

**eFigure.** Flowchart of the Systematic Review

**eTable 1.** Potential DDIs for Each Drug Administered Against COVID-19 With the Degree of Severity of the Associated Adverse Outcomes and/or ADRs Found by Using the Drug Interaction Checkers

**eTable 2.** Reviewed Studies With Reported DDIs and Their Predictability (YES or NO) by Using the DDI Checkers

This supplementary material has been provided by the authors to give readers additional information about their work.

**eFigure.** Flowchart of the Systematic Review

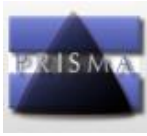

**PRISMA 2009 Flow Diagram**

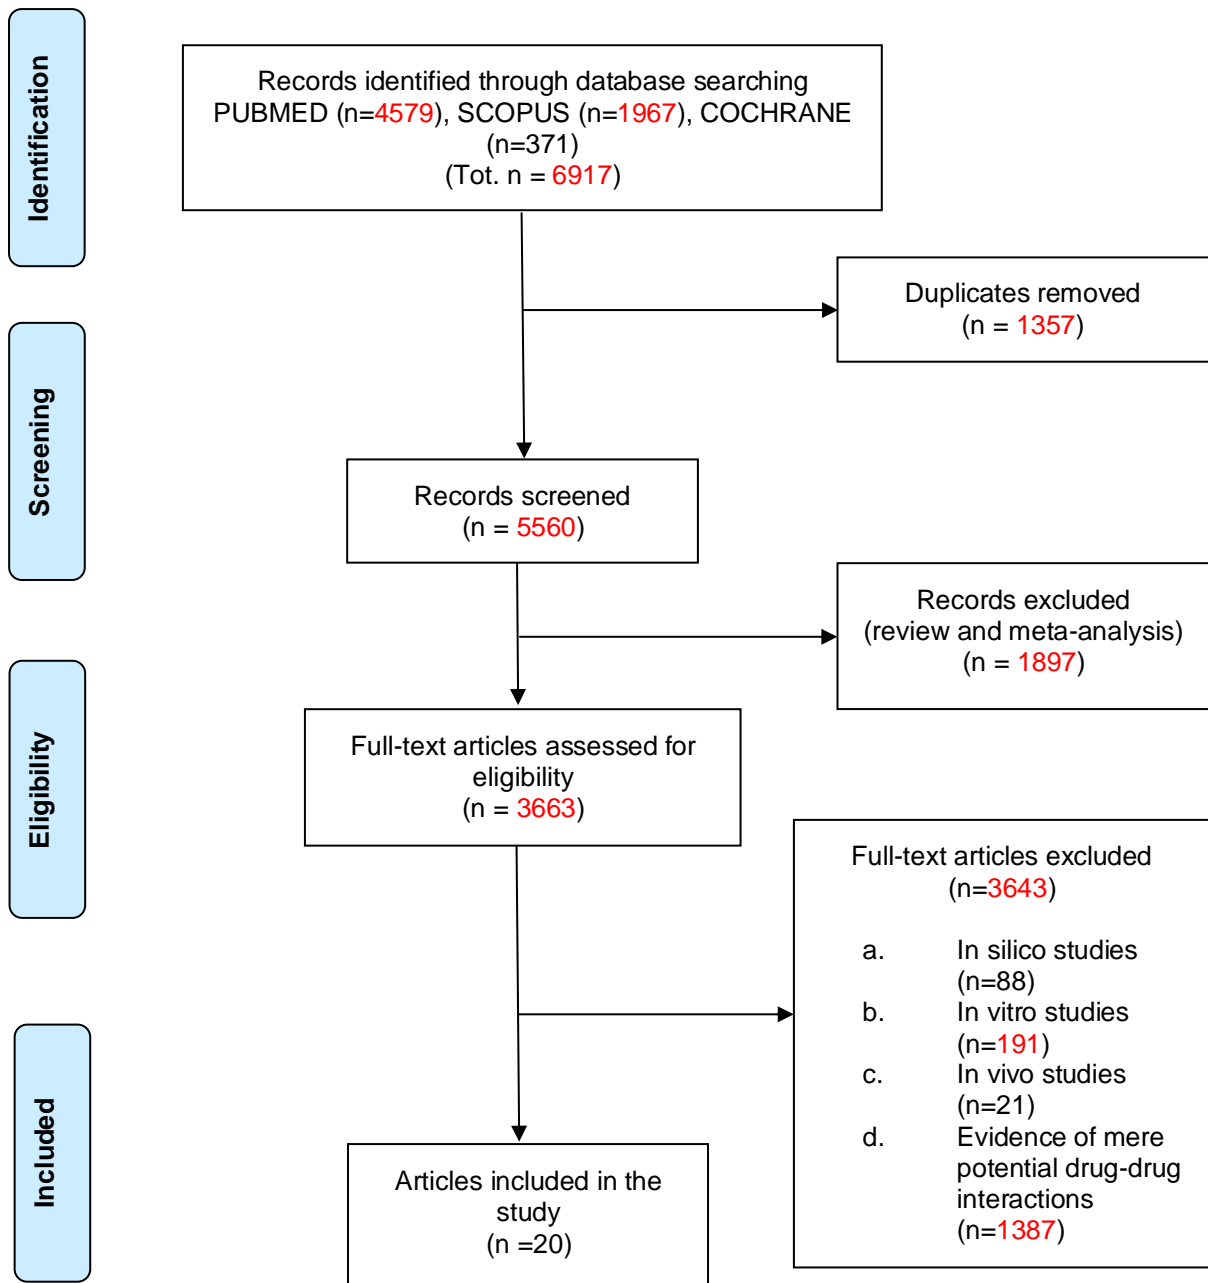

**eTable 1.** Potential DDIs for Each Drug Administered Against COVID-19 With the Degree of Severity of the Associated Adverse Outcomes and/or ADRs Found by Using the Drug Interaction Checkers

| Drug                   | No. of DDIs by drug interaction checkers |          |       |                        |                       |                            |                   |                               |                 |                  |                  |                          |                 |       |        |         | Total No. of DDIs |          |
|------------------------|------------------------------------------|----------|-------|------------------------|-----------------------|----------------------------|-------------------|-------------------------------|-----------------|------------------|------------------|--------------------------|-----------------|-------|--------|---------|-------------------|----------|
|                        | Drugs.com                                |          |       | Liverpool COVID-19 DDI |                       |                            | LexiComp          |                               |                 |                  | Medscape         |                          |                 |       | WebMD  |         |                   |          |
|                        | Major                                    | Moderate | Minor | Do not co-administer   | Potential interaction | Potential weak interaction | Avoid combination | Consider therapy modification | Monitor therapy | No action needed | Contra-indicated | Serious; use alternative | Monitor closely | Minor | Severe | Serious |                   | Moderate |
| Acalabrutinib          | 189                                      | 203      | 0     | NA                     | NA                    | NA                         | 20                | 15                            | 30              | 0                | 0                | 63                       | 168             | 0     | 3      | 18      | 4                 | 713      |
| Anakinra               | 33                                       | 285      | 7     | 8                      | 9                     | 29                         | 10                | 9                             | 9               | 0                | 2                | 63                       | 21              | 1     | 5      | 7       | 1                 | 499      |
| Azithromycin           | 64                                       | 224      | 21    | 24                     | 94                    | 12                         | 10                | 13                            | 47              | 11               | 1                | 38                       | 140             | 50    | 16     | 51      | 40                | 856      |
| Baricitinib            | 229                                      | 58       | 6     | 8                      | 12                    | 3                          | 11                | 12                            | 16              | 0                | 0                | 52                       | 4               | 0     | 1      | 3       | 0                 | 415      |
| Canakinumab            | 32                                       | 285      | 7     | 9                      | 8                     | 28                         | 10                | 9                             | 9               | 0                | 0                | 60                       | 18              | 0     | 3      | 6       | 1                 | 485      |
| Casirivimab-imdevimab  | 0                                        | 6        | 0     | NA                     | 1                     | NA                         | NA                | NA                            | NA              | NA               | 0                | NA                       | NA              | NA    | NA     | NA      | NA                | 7        |
| Chloroquine            | 67                                       | 296      | 15    | 35                     | 142                   | 17                         | 11                | 21                            | 68              | 16               | 10               | 38                       | 126             | 97    | 16     | 60      | 23                | 1058     |
| Cobicistat             | 166                                      | 216      | 16    | NA                     | NA                    | NA                         | 98                | 125                           | 109             | 31               | 22               | 72                       | 120             | 1     | 38     | 107     | 36                | 1157     |
| Cobicistat-darunavir   | 178                                      | 323      | 17    | NA                     | NA                    | NA                         | 122               | 157                           | 159             | 39               | NA               | NA                       | NA              | NA    | 43     | 118     | 37                | 1193     |
| Colchicine             | 85                                       | 116      | 5     | NA                     | NA                    | NA                         | 6                 | 8                             | 25              | 5                | 0                | 73                       | 65              | 2     | 0      | 5       | 5                 | 400      |
| Darunavir              | 80                                       | 312      | 18    | NA                     | NA                    | NA                         | 93                | 136                           | 138             | 37               | 28               | 102                      | 729             | 41    | 27     | 43      | 30                | 1814     |
| Defibrotide            | 61                                       | 67       | 7     | NA                     | NA                    | NA                         | 1                 | 6                             | 36              | 0                | 16               | 0                        | 42              | 0     | 2      | 5       | 3                 | 246      |
| Dexamethasone          | 117                                      | 507      | 51    | 1                      | 97                    | 3                          | 24                | 36                            | 63              | 0                | 19               | 123                      | 312             | 124   | 6      | 27      | 17                | 1527     |
| Emapalumb              | 17                                       | 58       | 0     | NA                     | NA                    | NA                         | 7                 | 9                             | 10              | 0                | 0                | 0                        | 4               | 0     | 3      | 5       | 1                 | 114      |
| Enoxaparin             | 92                                       | 82       | 7     | NA                     | NA                    | NA                         | 9                 | 6                             | 39              | 0                | 3                | 63                       | 139             | 17    | 3      | 11      | 12                | 483      |
| Bamlanivimab-etecevime | NA                                       | NA       | NA    | NA                     | 1                     | NA                         | 0                 | 3                             | 0               | 0                | 0                | NA                       | NA              | NA    | NA     | NA      | NA                | 4        |
| Favipiravir            | NA                                       | NA       | NA    | 0                      | 14                    | 37                         | 0                 | 1                             | 2               | 7                | NA               | NA                       | NA              | NA    | NA     | NA      | NA                | 61       |
| Fluvoxamine            | 112                                      | 537      | 19    | 26                     | 228                   | 22                         | 20                | 23                            | 133             | 20               | 6                | 114                      | 301             | 0     | 14     | 28      | 47                | 1650     |
| Hydroxychloroquine     | 60                                       | 268      | 5     | 35                     | 142                   | 17                         | 3                 | 2                             | 20              | 6                | 1                | 171                      | 17              | 2     | 4      | 7       | 3                 | 763      |
| Ibuprofen              | 92                                       | 255      | 14    | NA                     | NA                    | NA                         | 9                 | 24                            | 67              | 0                | 0                | 28                       | 247             | 101   | 4      | 13      | 26                | 880      |
| Interferon beta 1A     | 12                                       | 287      | 1     | NA                     | NA                    | NA                         | 1                 | 0                             | 1               | 0                | 0                | 3                        | 9               | 1     | 3      | 15      | 2                 | 335      |
| Interferon beta 1B     | 12                                       | 287      | 1     | 1                      | 14                    | 1                          | 1                 | 0                             | 1               | 0                | 0                | 3                        | 7               | 0     | 3      | 15      | 2                 | 348      |
| Ivermectin             | 0                                        | 75       | 2     | 0                      | 45                    | 4                          | 2                 | 2                             | 3               | 0                | 0                | 5                        | 49              | 0     | NA     | NA      | NA                | 187      |
| Ketoprofen             | 91                                       | 241      | 9     | NA                     | NA                    | NA                         | 9                 | 23                            | 66              | 0                | 0                | 19                       | 236             | 73    | 4      | 13      | 23                | 807      |
| Lopinavir-ritonavir    | 223                                      | 431      | 36    | 52                     | 208                   | 49                         | 123               | 173                           | 162             | 53               | 37               | 156                      | 438             | 34    | 45     | 135     | 59                | 2414     |

|                        |     |     |    |    |     |    |     |     |     |    |    |     |     |     |    |     |    |      |
|------------------------|-----|-----|----|----|-----|----|-----|-----|-----|----|----|-----|-----|-----|----|-----|----|------|
| Mavrilimumab           | NA  | NA  | NA | NA | NA  | NA | NA  | NA  | NA  | NA | NA | NA  | NA  | NA  | NA | NA  | NA | 0    |
| Methylprednisolone     | 79  | 364 | 37 | NA | NA  | NA | 16  | 27  | 58  | 13 | 1  | 70  | 242 | 119 | 3  | 15  | 14 | 1058 |
| Molnupiravir           | NA  | NA  | NA | NA | NA  | NA | 1   | 0   | 0   | 0  | NA | NA  | NA  | NA  | NA | NA  | NA | 1    |
| Nirmatrelvir-ritonavir | 220 | 355 | 38 | 53 | 131 | 50 | 124 | 160 | 230 | 79 | 32 | 16  | 57  | 0   | 43 | 131 | 52 | 1771 |
| Opaganib               | NA  | NA  | NA | NA | NA  | NA | NA  | NA  | NA  | NA | NA | NA  | NA  | NA  | NA | NA  | NA | 0    |
| Pamrevlumab            | NA  | NA  | NA | NA | NA  | NA | NA  | NA  | NA  | NA | NA | NA  | NA  | NA  | NA | NA  | NA | 0    |
| Paracetamol            | 18  | 74  | 35 | NA | NA  | NA | 0   | 4   | 20  | 0  | 0  | 3   | 24  | 50  | 0  | 1   | 3  | 232  |
| Regdanvimab            | NA  | NA  | NA | NA | NA  | NA | NA  | NA  | NA  | NA | NA | NA  | NA  | NA  | NA | NA  | NA | 0    |
| Remdesivir             | NA  | NA  | NA | 9  | 0   | 0  | NA  | NA  | NA  | NA | NA | NA  | NA  | NA  | 0  | 1   | 0  | 10   |
| Reparixin              | NA  | NA  | NA | NA | NA  | NA | NA  | NA  | NA  | NA | NA | NA  | NA  | NA  | NA | NA  | NA | 0    |
| Ritonavir              | 187 | 343 | 41 | NA | NA  | NA | 100 | 147 | 149 | 44 | 27 | 123 | 356 | 70  | 36 | 71  | 37 | 1731 |
| Ruxolitinib            | 84  | 224 | 43 | 8  | 66  | 8  | 13  | 15  | 27  | 5  | 0  | 25  | 42  | 102 | 3  | 6   | 1  | 672  |
| Sarilumab              | 40  | 134 | 7  | 8  | 9   | 29 | 8   | 9   | 10  | 0  | 0  | 13  | 21  | 0   | 4  | 8   | 3  | 303  |
| Selinexor              | 33  | 78  | 0  | NA | NA  | NA | 10  | 10  | 13  | 1  | 0  | 163 | 0   | 0   | 3  | 7   | 1  | 319  |
| Siltuximab             | 34  | 136 | 7  | NA | NA  | NA | 11  | 10  | 16  | 0  | 0  | 2   | 31  | 0   | 1  | 3   | 0  | 251  |
| Solnatide              | NA  | NA  | NA | NA | NA  | NA | NA  | NA  | NA  | NA | NA | NA  | NA  | NA  | NA | NA  | NA | 0    |
| Sotrovimab             | 0   | 6   | 0  | NA | NA  | NA | 0   | 3   | 0   | 0  | NA | NA  | NA  | NA  | 0  | 0   | 1  | 10   |
| Tocilizumab            | 40  | 206 | 7  | 8  | 9   | 29 | 9   | 9   | 10  | 0  | 0  | 62  | 24  | 2   | 4  | 8   | 1  | 428  |

Abbreviations: ADRs, adverse drug reactions; DDI, drug-drug interaction; NA, not available.

**eTable 2.** Reviewed Studies with reported DDIs and their predictability (YES or NO) by using the DDI-checkers. Last accessed February 13th, 2022.

| Reviewed studies                           | Drugs involved in potential DDIs                                   | DDIs-related adverse clinical outcomes and/or ADRs                                                               | Drugs.com | COVID-19 Drug Interactions | Lexicomp | Medscape | Webmd |
|--------------------------------------------|--------------------------------------------------------------------|------------------------------------------------------------------------------------------------------------------|-----------|----------------------------|----------|----------|-------|
| Anmella G. et al. (2020) <sup>18</sup>     | AZM + HCQ + LPV/r + paroxetine + risperidone + topiramate          | Behavioral disturbances                                                                                          | NO        | NO                         | YES      | YES      | YES   |
| Anmella G. et al. (2020) <sup>18</sup>     | AZM + HCQ + LPV/r + venlafaxine                                    | Mild QT interval prolongation (443 ms)                                                                           | YES       | YES                        | YES      | YES      | YES   |
| Bartirromo M. et al. (2020) <sup>19</sup>  | DRV/c + HCQ + tacrolimus                                           | Tacrolimus trough levels turned to be extremely high (90.5 ng/mL), intermittent abdominal pain, nausea and vomit | YES       | YES                        | YES      | YES      | NO    |
| Borba M. G. S. et al. (2020) <sup>20</sup> | AZM + ceftriaxone + CQ                                             | Rhabdomyolysis, myocarditis, severe arrhythmias, QT interval prolongation                                        | YES       | YES                        | YES      | YES      | YES   |
| Borba M. G. S. (2020) <sup>20</sup> et al. | AZM + ceftriaxone + CQ + oseltamivir                               | Rhabdomyolysis, myocarditis, severe arrhythmias, QT interval prolongation                                        | YES       | YES                        | YES      | YES      | YES   |
| Crescioli, G. et al. (2020) <sup>21</sup>  | Amiodarone + AZM + DRV/c + HCQ                                     | QT interval prolongation                                                                                         | YES       | YES                        | YES      | YES      | YES   |
| Crescioli, G. et al. (2020) <sup>21</sup>  | AZM + citalopram + HCQ + LPV/r                                     | QT interval prolongation                                                                                         | YES       | YES                        | YES      | YES      | YES   |
| Crescioli, G. et al. (2020) <sup>21</sup>  | AZM + DRV/c + HCQ                                                  | Diarrhoea, vomiting                                                                                              | YES       | NO                         | NO       | NO       | NO    |
| Crescioli, G. et al. (2020) <sup>21</sup>  | AZM + haloperidol + HCQ + levomepromazine + LPV/r + zuclopenthixol | QT interval prolongation                                                                                         | YES       | YES                        | YES      | YES      | YES   |
| Crescioli, G. et al. (2020) <sup>21</sup>  | AZM + haloperidol + HCQ + LPV/r                                    | QT interval prolongation                                                                                         | YES       | YES                        | YES      | YES      | YES   |
| Crescioli, G. et al. (2020) <sup>21</sup>  | AZM + HCQ + LPV/r                                                  | QT interval prolongation                                                                                         | YES       | YES                        | YES      | YES      | YES   |
| Crescioli, G. et al. (2020) <sup>21</sup>  | AZM + HCQ + LPV/r                                                  | QT interval prolongation, vomiting                                                                               | YES       | YES                        | NO       | YES      | YES   |
| Crescioli, G. et al. (2020) <sup>21</sup>  | AZM + HCQ + sertraline                                             | QT interval prolongation                                                                                         | YES       | YES                        | YES      | YES      | YES   |
| Crescioli, G. et al. (2020) <sup>21</sup>  | Citalopram + HCQ                                                   | QT interval prolongation                                                                                         | YES       | YES                        | YES      | YES      | YES   |
| Crescioli, G. et al. (2020) <sup>21</sup>  | DRV/c + haloperidol + HCQ                                          | QT interval prolongation                                                                                         | YES       | YES                        | YES      | YES      | YES   |
| Crescioli, G. et al. (2020) <sup>21</sup>  | DRV/c + HCQ                                                        | QT interval prolongation                                                                                         | NO        | NO                         | NO       | NO       | NO    |
| Crescioli, G. et al. (2020) <sup>21</sup>  | DRV/c + HCQ + LPV/r + tocilizumab                                  | Hypertransaminasemia                                                                                             | NO        | NO                         | NO       | NO       | NO    |
| Crescioli, G. et al. (2020) <sup>21</sup>  | DRV/c + HCQ + tocilizumab                                          | Psychosis, agitation, delirium, aggressiveness                                                                   | NO        | NO                         | YES      | NO       | NO    |
| Crescioli, G. et al. (2020) <sup>21</sup>  | DRV/c + tacrolimus                                                 | Nausea, vomiting, abdominal pain, drug level modification                                                        | YES       | NO                         | YES      | NO       | NO    |
| Crescioli, G. et al. (2020) <sup>21</sup>  | HCQ + LPV/r                                                        | QT interval prolongation, hypokalaemia                                                                           | YES       | YES                        | NO       | YES      | NO    |

|                                                         |                                                                                      |                                                                                      |     |     |     |     |     |
|---------------------------------------------------------|--------------------------------------------------------------------------------------|--------------------------------------------------------------------------------------|-----|-----|-----|-----|-----|
| Crescioli, G. et al. (2020) <sup>21</sup>               | HCQ + LPV/r                                                                          | QT interval prolongation                                                             | YES | YES | NO  | YES | NO  |
| Crescioli, G. et al. (2020) <sup>21</sup>               | HCQ + magnesium sulphate                                                             | QT interval prolongation, hypokalaemia                                               | NO  | NO  | NO  | NO  | NO  |
| Crescioli, G. et al. (2020) <sup>21</sup>               | HCQ + risperidone                                                                    | QT interval prolongation, atrial flutter, hemiplegia, hypokalaemia, major depression | YES | YES | YES | YES | YES |
| Crescioli, G. et al. (2020) <sup>21</sup>               | HCQ + trazodone                                                                      | QT interval prolongation                                                             | YES | YES | NO  | NO  | NO  |
| Elton Dajti et al. (2020) <sup>22</sup>                 | DRV/c + HCQ + prednisone + tacrolimus                                                | Increased tacrolimus levels                                                          | YES | YES | YES | YES | YES |
| Gautret P. et al. (2021) <sup>23</sup>                  | AZM + HCQ                                                                            | QT interval prolongation (>60ms), discontinuation of treatment                       | YES | YES | NO  | YES | YES |
| Ghani MU. et al. (2020) <sup>24</sup>                   | Apixaban + enoxaparin + HCQ + steroids                                               | A large intraparenchymal hemorrhage and cerebral edema                               | YES | YES | YES | NO  | NO  |
| Ghani MU. et al. (2020) <sup>24</sup>                   | Apixaban + HCQ + steroids + unfractionated heparin                                   | Scattered subarachnoid hemorrhages, a subdural hematoma                              | YES | NO  | YES | NO  | NO  |
| Ghani MU. et al. (2020) <sup>24</sup>                   | HCQ + steroids + unfractionated heparin                                              | Acute subarachnoid and intraparenchymal hemorrhages within the posterior fossa       | NO  | NO  | NO  | NO  | NO  |
| Li X. et al. (2020) <sup>25</sup>                       | Ganciclovir + LPV/r + oseltamivir + peramivir + penciclovir + rubavirin + umifenovir | Increase in D-dimer, haematological abnormalities                                    | NO  | NO  | NO  | NO  | NO  |
| Macías, J. et al. (2020) <sup>26</sup>                  | Amiodarone + LPV/r                                                                   | Orthostatic syncope                                                                  | YES | NO  | YES | NO  | NO  |
| Martínez-López-de-Castro N. et al. (2020) <sup>27</sup> | Alprazolam + LPV/r                                                                   | Psychiatric Disorders                                                                | NO  | NO  | YES | NO  | NO  |
| Martínez-López-de-Castro N. et al. (2020) <sup>27</sup> | Aripiprazole + digoxin + fentanyl + lithium + LPV/r + tacrolimus                     | Alteration of the concentration of blood levels                                      | YES | YES | YES | YES | YES |
| Martínez-López-de-Castro N. et al. (2020) <sup>27</sup> | AZM + HCQ                                                                            | Cutaneous reactions                                                                  | NO  | NO  | NO  | NO  | NO  |
| Martínez-López-de-Castro N. et al. (2020) <sup>27</sup> | AZM + LPV/r                                                                          | Gastrointestinal Disorders                                                           | YES | NO  | NO  | NO  | NO  |
| Martínez-López-de-Castro N. et al. (2020) <sup>27</sup> | HCQ + LPV/r                                                                          | Hyperglycaemia                                                                       | NO  | NO  | NO  | NO  | NO  |
| Martínez-López-de-Castro N. et al. (2020) <sup>27</sup> | HCQ + LPV/r                                                                          | Cutaneous reactions                                                                  | NO  | NO  | NO  | NO  | NO  |

|                                                         |                                          |                                                                       |     |     |     |     |     |
|---------------------------------------------------------|------------------------------------------|-----------------------------------------------------------------------|-----|-----|-----|-----|-----|
| Martínez-López-de-Castro N. et al. (2020) <sup>27</sup> | HCQ + LPV/r                              | Gastrointestinal disorders                                            | YES | NO  | NO  | NO  | NO  |
| Martínez-López-de-Castro N. et al. (2020) <sup>27</sup> | HCQ + LPV/r                              | Psychiatric Disorders                                                 | NO  | NO  | NO  | NO  | NO  |
| Martínez-López-de-Castro N. et al. (2020) <sup>27</sup> | HCQ + tacrolimus                         | Alteration of the concentration of blood levels                       | NO  | NO  | NO  | NO  | NO  |
| Martínez-López-de-Castro N. et al. (2020) <sup>27</sup> | Interferon beta + metimazole             | Haematological Toxicity                                               | NO  | YES | NO  | NO  | NO  |
| Martínez-López-de-Castro N. et al. (2020) <sup>27</sup> | LPV/r + methylprednisolone or prednisone | Hyperglycaemia                                                        | NO  | NO  | YES | NO  | NO  |
| Martínez-López-de-Castro N. et al. (2020) <sup>27</sup> | LPV/r + midazolam or diazepam            | Increased sedative effect                                             | YES | YES | YES | YES | NO  |
| Martínez-López-de-Castro N. et al. (2020) <sup>27</sup> | LPV/r + propofol                         | Increased triglyceride level                                          | NO  | NO  | NO  | NO  | NO  |
| Martínez-López-de-Castro N. et al. (2020) <sup>27</sup> | LPV/r + simvastatina                     | Liver toxicity                                                        | NO  | NO  | NO  | YES | NO  |
| Martínez-López-de-Castro N. et al. (2020) <sup>27</sup> | LPV/r + valproate                        | Seizures                                                              | NO  | NO  | YES | NO  | NO  |
| Meriglier, E. et al. (2021) <sup>28</sup>               | Darunavir/ritonavir + HCQ                | Diarrhoea grade I and II; ECG abnormalities; hepatic enzyme elevation | NO  | NO  | NO  | YES | YES |
| Meriglier, E. et al. (2021) <sup>28</sup>               | HCQ + LPV/r                              | Diarrhoea grade I and II; ECG abnormalities; severe nausea            | YES | YES | NO  | YES | NO  |
| Meziyerh S. et al. (2020) <sup>29</sup>                 | Everolimus + HCQ + LPV/r                 | Dyspnoea/tachypnea, everolimus plasma concentrations increased.       | YES | YES | YES | YES | NO  |
| Nham E. et al. (2020) <sup>30</sup>                     | Ceftriaxone + levofloxacin + LPV/r       | Severe thrombocytopenia with epistaxis and petechiae.                 | NO  | NO  | NO  | NO  | NO  |
| Ramireddy A. et al. (2020) <sup>31</sup>                | AZM + HCQ                                | QT interval prolongation                                              | YES | YES | YES | YES | YES |
| Skroza N. et al. (2020) <sup>32</sup>                   | Ceftriaxone + enoxoparin + HCQ + LPV/r   | Urticarial vasculitis due to adverse drug reaction                    | NO  | NO  | NO  | NO  | NO  |
| Szekely Y. et al. (2020) <sup>33</sup>                  | CQ + letrozole + memantine               | Extreme QT interval prolongation (720 ms), torsades de pointes        | NO  | NO  | NO  | NO  | NO  |

|                                            |                                  |                                                                                                                                        |            |            |            |            |            |
|--------------------------------------------|----------------------------------|----------------------------------------------------------------------------------------------------------------------------------------|------------|------------|------------|------------|------------|
| Teoli D. et al.(2021) <sup>34</sup>        | Remdesivir + tramadol            | Severe pain localized in the legs                                                                                                      | <b>NO</b>  | <b>NO</b>  | <b>YES</b> | <b>NO</b>  | <b>NO</b>  |
| Thammathiwat T. et al (2021) <sup>35</sup> | Darunavir/ritonavir + tacrolimus | Tacrolimus levels turned significantly high, acute kidney injury, lymphopenia, PiO2/FiO2 was lowered, tacrolimus withdrawn for 10 days | <b>YES</b> | <b>NO</b>  | <b>YES</b> | <b>YES</b> | <b>YES</b> |
| Treon SP. et al. (2020) <sup>36</sup>      | AZM + HCQ + ibrutinib            | Wide QRS complex tachyarrhythmia                                                                                                       | <b>YES</b> | <b>YES</b> | <b>NO</b>  | <b>YES</b> | <b>YES</b> |
| Yekedüz E. et al. (2020) <sup>37</sup>     | Anti-diabetics + HCQ             | Hypoglycemia                                                                                                                           | <b>NO</b>  | <b>NO</b>  | <b>YES</b> | <b>NO</b>  | <b>NO</b>  |
